# Supplementary material for: Self-induced synthesis under neutral conditions and novel visible light photocatalytic activity of Ag4V2O7 polyoxometalate
Source: Royal Society of Chemistry journal article supplement (doi:10.1039/d1nj01390d), 2021-01-01
Supplement: d1nj01390d1.pdf [file d1nj01390d1.pdf]

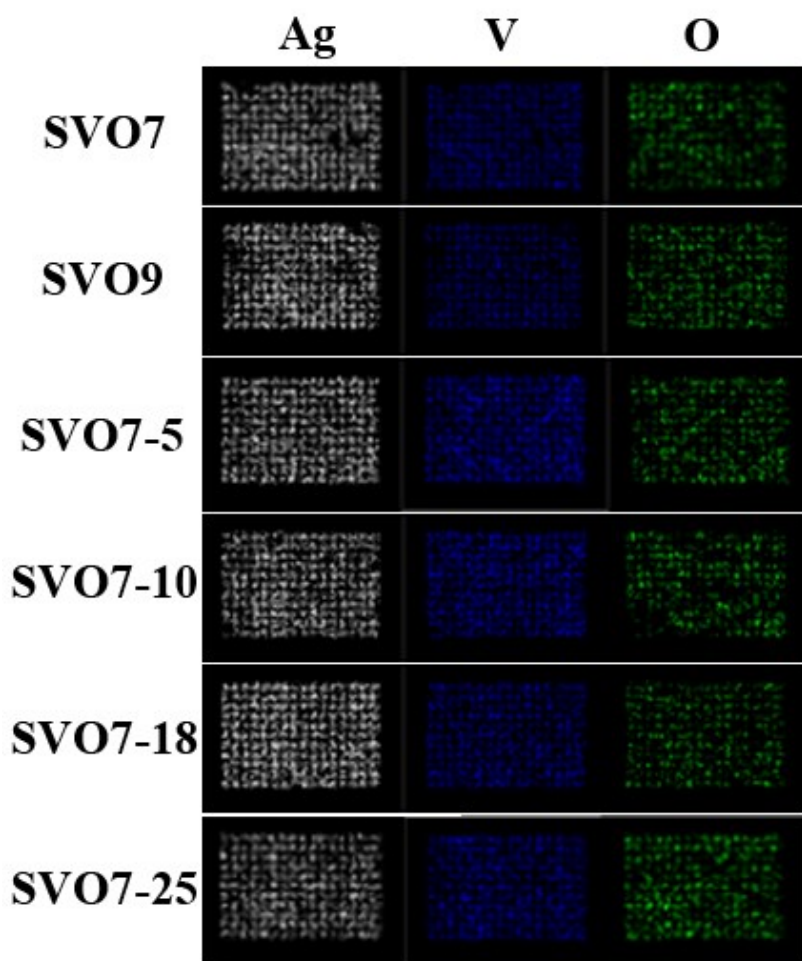

S1. The mapping images of SVO POMs with Ag, V, and O elements.

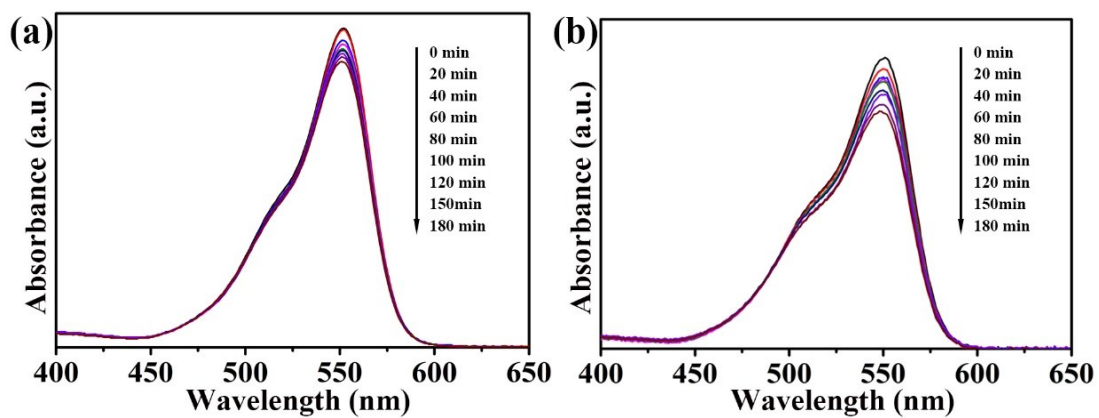

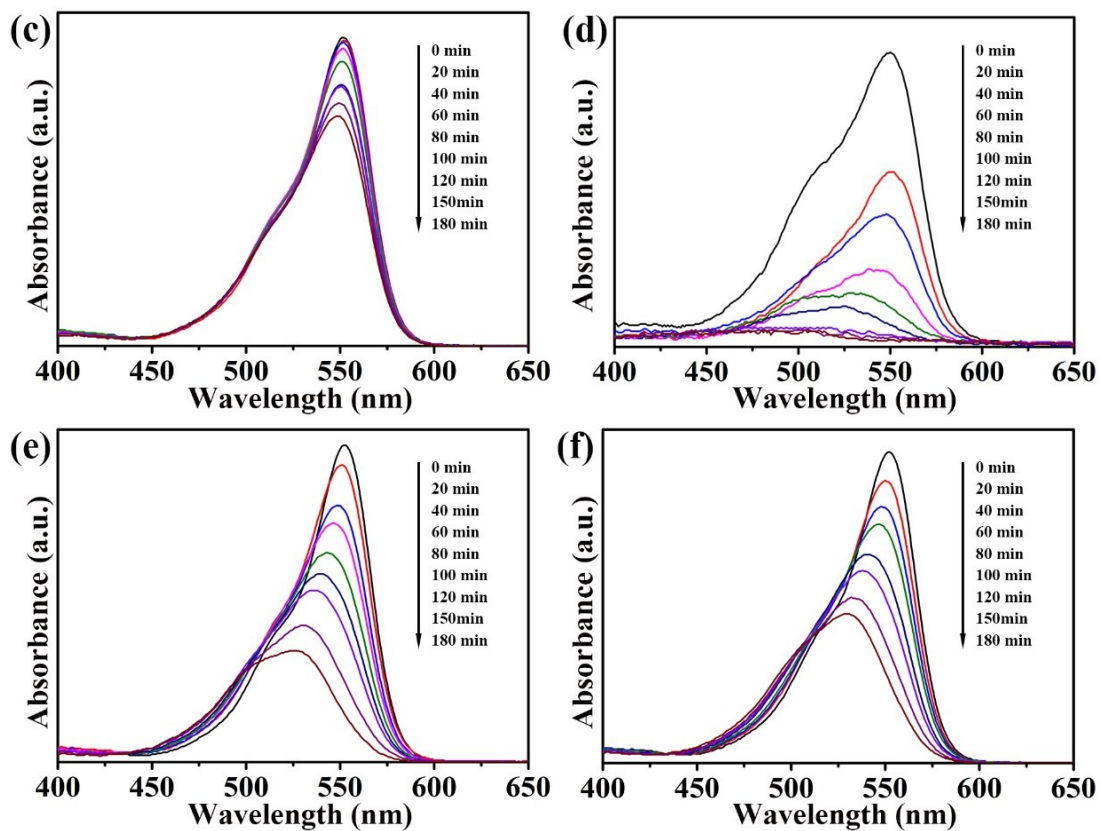

S2. The concentration changes of Rh. B during the photodegradation process with the catalyst of (a) SVO7, (b) SVO9, (c) SVO7-4, (d) SVO7-10, (e) SVO7-18, and (f) SVO7-25 POMs.
